# Supplementary material for: RNA Sequencing Reveals the Activation of Wnt Signaling in Low Flow Rate Brain Arteriovenous Malformations
Source: PubMed Central journal article supplement — J Am Heart Assoc. 2019 Jun 7;8(12):e012746. doi: 10.1161/JAHA.119.012746 (PMC6645621; doi:10.1161/jaha.119.012746), 2019-06-07
Supplement: JAH3-8-e012746-s001.pdf [file JAH3-8-e012746-s001.pdf]

# **SUPPLEMENTAL MATERIAL**

## **Data S1.**

### **Supplemental Methods**

#### ***Immunofluorescence***

For immunofluorescent staining, transfected HUVECs and HBVSMCs were fixed in paraformaldehyde. After permeabilization in 0.2% Triton X-100 and blocking, the cells were incubated with primary antibodies against  $\beta$ -catenin (1:250, ab32572, Abcam) overnight at 4°C and then incubated with an Alexa Fluor 488-conjugated goat antibody against rabbit (1:200, ab150077, Abcam) at room temperature for 1 h. Finally, the cells were counterstained with 4,6-diamidino-2-phenylindole and imaged using an EVOS™ FL Auto 2 Imaging System (Invitrogen).

#### ***Western blotting***

Whole-cell lysates were prepared using RIPA buffer. Equal amounts of total protein (20  $\mu$ g) from cell lysates were loaded on a 10% SDS/PAGE gel, transferred to a PVDF membrane (Millipore), and detected using a BOX F3 Gel Documentation System (Syngene). The primary antibodies used were as follows: FZD10 (1:1000, NBP2-23659SS, Novus), MYOC (1:500, MAB3446, R&D),  $\beta$ -catenin (1:4000, ab32572, Abcam), JNK (1:1000, 9252S, CST) and p-JNK (1:1000, Thr183/Tyr185, 81E11, CST).  $\beta$ -actin (1:2000, P30002M, Abmart) was used as the

loading control. The secondary antibodies used were goat anti-rabbit (1:3000, M21002, Abmart) and goat anti-mouse (1:3000, M21001, Abmart) IgG-HRP.

### ***Wound healing assay***

Wound healing assays were performed with an Ibidi Culture-Insert (Ibidi). Briefly, transfected cells were seeded into the wells to obtain a confluent layer. After appropriate cell attachment, the Culture-Insert was gently removed using sterile tweezers. Then, the well was filled with serum-free medium to exclude the effect of cell proliferation. The percentage of the reduced area was measured at 48 h post-transfection with NIH ImageJ software.

### ***Tube formation assay***

Ibidi  $\mu$ -Slide Angiogenesis (Ibidi) was used to perform tube formation assays with HUVECs and HBVSMCs. Briefly, 48 h after transfection, cells were seeded on Matrigel (BD Inc., San Jose, CA, US) in the wells of the Slides. After the formation of tube structures, the number of meshes was measured and quantified.

### ***Proliferation assay***

Briefly, cells ( $1 \times 10^4$  cells/well) were seeded in 96-well plates with 100  $\mu$ L of medium per well. Cell Counting Kit-8 solution (Dojindo Laboratories, Kumamoto, Japan) was added to the cell culture medium to a final concentration of 5  $\mu$ L/100  $\mu$ L and incubated for an additional 3 h

at 37°C. The absorbance at 450 nm was measured using a microplate reader (Molecular Devices).

**Table S1. Primers used for RT-qPCR.**

| Primers for genes | Sequence              |
|-------------------|-----------------------|
| FZD10-F           | TATCGGGCTCTTCTCTGTGC  |
| FZD10-R           | GACTGGGCAGGGATCTCATA  |
| MYOC-F            | ATCTCAGGAGTGGAGAGGGA  |
| MYOC-R            | CTGGCTGATGAGGTCATACTC |
| AXIN2-F           | AGTGTGAGGTCCACGGAAAC  |
| AXIN2-R           | CTGGTGCAAAGACATAGCCA  |
| TCF-1-F           | AGGAGATGAGAGCCAAGGTCA |
| TCF-1-R           | AGCCTGGGTATAGCTGCATGT |
| GAPDH-F           | AATGACCCCTTCATTGAC    |
| GAPDH-R           | TCCACGACGTACTCAGCGC   |

**Table S2. Differential expression profile.**

| Ensembl ID         | Gene symbol | FPKM (LFR) | FPKM (HFR) | FC    | P value  |
|--------------------|-------------|------------|------------|-------|----------|
| ENSG00000198812.3  | LRRC10      | 0.036      | 0.006      | 6.338 | 7.41E-06 |
| ENSG00000120833.9  | SOCS2       | 16.421     | 7.754      | 2.118 | 1.46E-05 |
| ENSG00000223516.1  | AFF2-IT1    | 0.288      | 0.040      | 7.196 | 4.89E-05 |
| ENSG00000183888.4  | C1orf64     | 2.004      | 0.933      | 2.149 | 5.19E-05 |
| ENSG00000204950.2  | LRRC10B     | 4.075      | 1.551      | 2.628 | 6.55E-05 |
| ENSG00000167034.9  | NKX3-1      | 1.892      | 0.767      | 2.467 | 7.85E-05 |
| ENSG00000111432.4  | FZD10       | 1.935      | 0.726      | 2.667 | 0.000112 |
| ENSG00000133665.8  | DYDC2       | 0.473      | 0.157      | 3.010 | 0.000124 |
| ENSG00000244040.1  | IL12A-AS1   | 0.147      | 0.060      | 2.446 | 0.00014  |
| ENSG00000185022.7  | MAFF        | 42.090     | 19.994     | 2.105 | 0.000164 |
| ENSG00000108342.8  | CSF3        | 9.461      | 1.070      | 8.842 | 0.000169 |
| ENSG00000172602.5  | RND1        | 23.382     | 9.117      | 2.565 | 0.000211 |
| ENSG00000034971.10 | MYOC        | 0.329      | 0.067      | 4.895 | 0.000237 |
| ENSG00000197826.7  | C4orf22     | 0.416      | 0.049      | 8.434 | 0.000252 |
| ENSG00000231274.4  | SBK3        | 0.136      | 0.014      | 9.535 | 0.000347 |
| ENSG00000171124.8  | FUT3        | 0.064      | 0.011      | 5.928 | 0.000403 |
| ENSG00000180616.4  | SSTR2       | 9.698      | 4.829      | 2.008 | 0.000489 |
| ENSG00000228002.2  | DHX9P1      | 0.049      | 0.014      | 3.424 | 0.000525 |
| ENSG00000268654.1  | MIMT1       | 0.420      | 0.141      | 2.987 | 0.000711 |
| ENSG00000130164.7  | LDLR        | 45.012     | 21.491     | 2.094 | 0.000761 |
| ENSG00000199218.1  | RN7SKP184   | 1.105      | 0.400      | 2.762 | 0.000798 |
| ENSG00000137699.12 | TRIM29      | 0.633      | 0.216      | 2.934 | 0.00086  |
| ENSG00000213612.3  | FAM220CP    | 0.867      | 0.377      | 2.300 | 0.000889 |
| ENSG00000100078.3  | PLA2G3      | 0.060      | 0.014      | 4.181 | 0.001184 |
| ENSG00000142973.8  | CYP4B1      | 0.514      | 0.095      | 5.405 | 0.001186 |
| ENSG00000244112.2  | RN7SL508P   | 1.858      | 0.501      | 3.710 | 0.001364 |
| ENSG00000235631.1  | RNF148      | 1.429      | 0.700      | 2.042 | 0.001417 |
| ENSG00000164736.5  | SOX17       | 9.911      | 4.394      | 2.256 | 0.001599 |
| ENSG00000147869.4  | CER1        | 0.122      | 0.037      | 3.274 | 0.001648 |
| ENSG00000228670.4  | NANOGP2     | 0.471      | 0.184      | 2.565 | 0.001669 |
| ENSG00000115602.12 | IL1RL1      | 11.498     | 3.403      | 3.379 | 0.001871 |
| ENSG00000101187.11 | SLCO4A1     | 6.244      | 2.778      | 2.248 | 0.001963 |
| ENSG00000134398.8  | ERN2        | 0.099      | 0.027      | 3.664 | 0.00215  |
| ENSG00000271723.1  | MROH7-TTC4  | 0.873      | 0.414      | 2.108 | 0.002176 |
| ENSG00000232354.3  | VIPR1-AS1   | 0.494      | 0.238      | 2.075 | 0.002255 |

|                    |          |         |        |       |          |
|--------------------|----------|---------|--------|-------|----------|
| ENSG0000007908.11  | SELE     | 53.814  | 19.319 | 2.786 | 0.002313 |
| ENSG00000117595.6  | IRF6     | 2.576   | 1.140  | 2.259 | 0.002518 |
| ENSG00000116176.6  | TPSG1    | 0.162   | 0.065  | 2.491 | 0.002607 |
| ENSG00000057593.9  | F7       | 0.462   | 0.205  | 2.256 | 0.002872 |
| ENSG00000171873.6  | ADRA1D   | 0.593   | 0.296  | 2.000 | 0.003027 |
| ENSG00000229268.1  | PES1P2   | 0.185   | 0.084  | 2.209 | 0.003077 |
| ENSG00000165269.8  | AQP7     | 0.315   | 0.132  | 2.385 | 0.003103 |
| ENSG00000198535.5  | C2CD4A   | 0.895   | 0.144  | 6.200 | 0.003158 |
| ENSG00000137225.8  | CAPN11   | 0.112   | 0.271  | 0.413 | 0.003262 |
| ENSG00000257482.3  | ZNF727   | 0.663   | 0.310  | 2.139 | 0.003354 |
| ENSG00000158055.11 | GRHL3    | 0.853   | 0.393  | 2.171 | 0.003587 |
| ENSG00000164142.11 | FAM160A1 | 0.939   | 0.349  | 2.687 | 0.003625 |
| ENSG00000175592.4  | FOSL1    | 17.211  | 7.112  | 2.420 | 0.003666 |
| ENSG00000104369.4  | JPH1     | 3.205   | 1.446  | 2.216 | 0.00376  |
| ENSG00000177182.6  | CLVS1    | 2.702   | 1.325  | 2.039 | 0.003943 |
| ENSG00000154864.7  | PIEZO2   | 4.403   | 8.821  | 0.499 | 0.004084 |
| ENSG00000146674.10 | IGFBP3   | 75.574  | 36.226 | 2.086 | 0.004172 |
| ENSG00000130037.3  | KCNA5    | 7.247   | 3.254  | 2.227 | 0.004236 |
| ENSG00000267206.1  | LCN6     | 1.904   | 0.926  | 2.056 | 0.004536 |
| ENSG00000234373.1  | SNX18P7  | 0.766   | 0.175  | 4.377 | 0.004598 |
| ENSG00000127530.2  | OR7C1    | 0.168   | 0.066  | 2.562 | 0.00464  |
| ENSG00000174567.7  | GOLT1A   | 0.269   | 0.081  | 3.299 | 0.004671 |
| ENSG00000241890.1  | RPL13P4  | 0.283   | 0.088  | 3.224 | 0.00474  |
| ENSG00000180440.3  | SERTM1   | 2.006   | 0.753  | 2.664 | 0.004994 |
| ENSG00000181577.11 | C6orf223 | 0.422   | 0.205  | 2.061 | 0.00529  |
| ENSG00000149735.2  | GPHA2    | 0.346   | 0.155  | 2.235 | 0.005382 |
| ENSG00000086544.2  | ITPKC    | 16.885  | 7.662  | 2.204 | 0.005402 |
| ENSG00000206199.5  | ANKUB1   | 0.528   | 1.083  | 0.487 | 0.005797 |
| ENSG00000086717.14 | PPEF1    | 0.781   | 0.382  | 2.043 | 0.005863 |
| ENSG00000125144.9  | MT1G     | 59.161  | 28.311 | 2.090 | 0.005964 |
| ENSG00000149305.2  | HTR3B    | 0.863   | 0.301  | 2.871 | 0.00632  |
| ENSG00000256977.6  | LIMS3    | 1.790   | 0.522  | 3.428 | 0.006417 |
| ENSG00000205177.5  | C11orf91 | 3.039   | 1.170  | 2.598 | 0.006421 |
| ENSG00000272636.1  | DOC2B    | 6.229   | 3.054  | 2.040 | 0.006435 |
| ENSG00000224551.1  | HMGB3P21 | 0.174   | 0.476  | 0.364 | 0.006437 |
| ENSG00000172987.8  | HPSE2    | 0.704   | 0.290  | 2.427 | 0.006449 |
| ENSG00000136244.7  | IL6      | 129.305 | 40.561 | 3.188 | 0.006634 |
| ENSG00000137251.11 | TINAG    | 0.084   | 0.022  | 3.772 | 0.006641 |
| ENSG00000171056.6  | SOX7     | 8.044   | 3.779  | 2.128 | 0.006691 |

|                    |            |         |         |       |          |
|--------------------|------------|---------|---------|-------|----------|
| ENSG00000172995.12 | ARPP21     | 33.612  | 16.146  | 2.082 | 0.006779 |
| ENSG00000156427.7  | FGF18      | 2.521   | 1.061   | 2.375 | 0.006899 |
| ENSG00000124249.5  | KCNK15     | 1.340   | 0.617   | 2.171 | 0.007017 |
| ENSG00000205502.3  | C2CD4B     | 17.177  | 5.054   | 3.399 | 0.007036 |
| ENSG00000160963.9  | COL26A1    | 2.743   | 1.311   | 2.093 | 0.007248 |
| ENSG00000257302.1  | FAHD2P1    | 0.372   | 0.115   | 3.231 | 0.007249 |
| ENSG00000256391.1  | SDIM1      | 0.554   | 0.206   | 2.681 | 0.007385 |
| ENSG00000174482.6  | LINGO2     | 2.772   | 1.319   | 2.101 | 0.00746  |
| ENSG00000237990.2  | CNTN4-AS1  | 0.250   | 0.108   | 2.320 | 0.007565 |
| ENSG00000187479.4  | C11orf96   | 219.261 | 100.593 | 2.180 | 0.007604 |
| ENSG00000226627.1  | SHANK2-AS1 | 0.614   | 0.300   | 2.046 | 0.007605 |
| ENSG00000229417.1  | NPM1P25    | 0.446   | 0.958   | 0.466 | 0.007795 |
| ENSG00000121446.13 | RGSL1      | 0.013   | 0.004   | 3.027 | 0.007928 |
| ENSG00000141433.8  | ADCYAP1    | 3.499   | 0.871   | 4.018 | 0.008021 |
| ENSG00000053438.7  | NNAT       | 25.518  | 10.636  | 2.399 | 0.008035 |
| ENSG00000258392.1  | RPA2P1     | 0.261   | 0.117   | 2.226 | 0.008127 |
| ENSG00000264315.1  | HNRNPA1P11 | 1.133   | 0.342   | 3.312 | 0.008148 |
| ENSG00000254244.1  | PAICSP4    | 1.582   | 0.682   | 2.319 | 0.008468 |
| ENSG00000183729.3  | NPBWR1     | 0.122   | 0.042   | 2.886 | 0.008484 |
| ENSG00000237665.1  | GRM7-AS2   | 0.975   | 0.243   | 4.015 | 0.008604 |
| ENSG00000229975.1  | LIPT1P1    | 0.804   | 0.354   | 2.269 | 0.008689 |
| ENSG00000143333.6  | RGS16      | 28.924  | 13.181  | 2.194 | 0.008781 |
| ENSG00000121742.11 | GJB6       | 7.545   | 3.026   | 2.493 | 0.009014 |
| ENSG00000136883.8  | KIF12      | 0.479   | 0.187   | 2.558 | 0.00905  |
| ENSG00000255277.2  | ABCC6P2    | 0.234   | 0.111   | 2.096 | 0.009177 |
| ENSG00000140968.6  | IRF8       | 11.845  | 25.039  | 0.473 | 0.009297 |
| ENSG00000176697.14 | BDNF       | 2.186   | 0.871   | 2.508 | 0.009474 |
| ENSG00000145040.3  | UCN2       | 1.194   | 0.524   | 2.276 | 0.009507 |
| ENSG00000224683.1  | RPL36AP29  | 0.550   | 0.178   | 3.092 | 0.009523 |
| ENSG00000183036.6  | PCP4       | 9.836   | 4.837   | 2.033 | 0.009578 |
| ENSG00000132510.6  | KDM6B      | 65.547  | 32.118  | 2.041 | 0.009782 |
| ENSG00000130368.4  | MAS1       | 0.762   | 0.278   | 2.742 | 0.009861 |
| ENSG00000188817.3  | SNTN       | 0.082   | 0.035   | 2.347 | 0.009937 |
| ENSG00000120280.5  | CXorf21    | 2.545   | 5.396   | 0.472 | 0.009988 |
| ENSG00000188282.8  | RUFY4      | 0.288   | 0.678   | 0.425 | 0.010029 |
| ENSG00000168334.8  | XIRP1      | 1.756   | 0.561   | 3.128 | 0.010062 |
| ENSG00000266274.1  | RN7SL138P  | 8.730   | 21.470  | 0.407 | 0.010375 |
| ENSG00000103196.7  | CRISPLD2   | 76.349  | 36.091  | 2.115 | 0.010533 |
| ENSG00000213450.4  | VDAC1P7    | 0.182   | 0.062   | 2.927 | 0.010617 |



|                    |           |        |        |       |          |
|--------------------|-----------|--------|--------|-------|----------|
| ENSG00000167772.7  | ANGPTL4   | 16.794 | 8.347  | 2.012 | 0.010703 |
| ENSG00000226981.2  | ABHD17AP6 | 0.404  | 0.103  | 3.926 | 0.01083  |
| ENSG00000171643.9  | S100Z     | 0.178  | 0.495  | 0.360 | 0.010835 |
| ENSG00000143627.13 | PKLR      | 0.079  | 0.029  | 2.704 | 0.011001 |
| ENSG00000264668.1  | ZFP41     | 0.519  | 0.241  | 2.158 | 0.011084 |
| ENSG00000103154.5  | NECAB2    | 10.238 | 4.693  | 2.182 | 0.011159 |
| ENSG00000179639.6  | FCER1A    | 1.410  | 2.904  | 0.486 | 0.011223 |
| ENSG00000110680.8  | CALCA     | 0.480  | 0.149  | 3.215 | 0.011261 |
| ENSG00000157502.8  | MUM1L1    | 0.924  | 0.440  | 2.100 | 0.011372 |
| ENSG00000136997.10 | MYC       | 54.727 | 26.951 | 2.031 | 0.011519 |
| ENSG00000188522.10 | FAM83G    | 2.543  | 1.141  | 2.228 | 0.011593 |
| ENSG00000261429.2  | DPPA2P4   | 0.421  | 0.135  | 3.119 | 0.011595 |
| ENSG00000129451.7  | KLK10     | 0.211  | 0.065  | 3.239 | 0.01165  |
| ENSG00000010319.2  | SEMA3G    | 13.011 | 6.071  | 2.143 | 0.011757 |
| ENSG00000229001.1  | ACTBP14   | 0.111  | 0.052  | 2.136 | 0.011815 |
| ENSG00000198576.2  | ARC       | 23.119 | 7.884  | 2.932 | 0.011908 |
| ENSG00000101204.11 | CHRNA4    | 2.483  | 1.186  | 2.093 | 0.011911 |
| ENSG00000183186.6  | C2CD4C    | 3.168  | 1.370  | 2.312 | 0.01208  |
| ENSG00000172818.5  | OVOL1     | 0.175  | 0.059  | 2.959 | 0.012181 |
| ENSG00000235280.2  | MCF2L-AS1 | 0.306  | 0.135  | 2.268 | 0.012291 |
| ENSG00000149380.7  | P4HA3     | 0.993  | 2.229  | 0.446 | 0.012513 |
| ENSG00000244752.2  | CRYBB2    | 0.185  | 0.091  | 2.025 | 0.01252  |
| ENSG00000178394.3  | HTR1A     | 2.163  | 0.906  | 2.388 | 0.01261  |
| ENSG00000095752.2  | IL11      | 1.019  | 0.373  | 2.732 | 0.012832 |
| ENSG00000116544.7  | DLGAP3    | 18.073 | 8.741  | 2.068 | 0.013064 |
| ENSG00000181418.7  | DDN       | 25.821 | 11.666 | 2.213 | 0.013537 |
| ENSG00000137825.6  | ITPKA     | 8.021  | 3.359  | 2.388 | 0.013837 |
| ENSG00000139865.12 | TTC6      | 0.261  | 0.105  | 2.481 | 0.013882 |
| ENSG00000184908.13 | CLCNKB    | 0.151  | 0.063  | 2.395 | 0.013972 |
| ENSG00000138316.6  | ADAMTS14  | 0.742  | 1.821  | 0.407 | 0.014085 |
| ENSG00000111247.10 | RAD51AP1  | 1.131  | 2.484  | 0.455 | 0.014337 |
| ENSG00000233123.1  | LINC01007 | 1.620  | 0.329  | 4.930 | 0.014378 |
| ENSG00000128342.4  | LIF       | 32.215 | 11.834 | 2.722 | 0.014481 |
| ENSG00000124664.6  | SPDEF     | 0.227  | 0.099  | 2.289 | 0.014839 |
| ENSG00000271108.1  | KATNBL1P5 | 0.203  | 0.645  | 0.315 | 0.015181 |
| ENSG00000143228.8  | NUF2      | 0.494  | 1.236  | 0.400 | 0.0154   |
| ENSG00000149654.5  | CDH22     | 4.936  | 2.270  | 2.175 | 0.015578 |
| ENSG00000188959.9  | C9orf152  | 0.115  | 0.049  | 2.370 | 0.016061 |
| ENSG00000225101.3  | OR52K3P   | 0.391  | 0.881  | 0.443 | 0.01636  |

|                    |            |        |        |       |          |
|--------------------|------------|--------|--------|-------|----------|
| ENSG00000177508.11 | IRX3       | 2.102  | 0.927  | 2.268 | 0.016441 |
| ENSG00000105509.6  | HAS1       | 3.376  | 1.368  | 2.468 | 0.016618 |
| ENSG00000184601.6  | C14orf180  | 0.416  | 0.196  | 2.119 | 0.016819 |
| ENSG00000144550.8  | CPNE9      | 1.875  | 0.851  | 2.202 | 0.016827 |
| ENSG00000166823.5  | MESP1      | 1.135  | 0.555  | 2.045 | 0.017257 |
| ENSG00000226510.1  | UPK1A-AS1  | 0.135  | 0.057  | 2.360 | 0.017289 |
| ENSG00000144119.3  | C1QL2      | 1.780  | 0.721  | 2.468 | 0.017418 |
| ENSG00000118017.3  | A4GNT      | 0.045  | 0.124  | 0.359 | 0.017737 |
| ENSG00000251449.2  | MTND1P19   | 2.828  | 0.902  | 3.135 | 0.017775 |
| ENSG00000143340.6  | FAM163A    | 0.309  | 0.093  | 3.327 | 0.017798 |
| ENSG00000071282.7  | LMCD1      | 67.751 | 30.796 | 2.200 | 0.017922 |
| ENSG00000123219.8  | CENPK      | 1.367  | 2.982  | 0.458 | 0.018003 |
| ENSG00000189181.3  | OR14I1     | 0.709  | 0.251  | 2.829 | 0.018163 |
| ENSG00000263878.1  | DLGAP1-AS4 | 2.446  | 1.070  | 2.286 | 0.018291 |
| ENSG00000134551.8  | PRH2       | 0.325  | 0.659  | 0.493 | 0.018548 |
| ENSG00000239794.2  | RN7SL653P  | 1.805  | 0.863  | 2.092 | 0.01859  |
| ENSG00000105492.11 | SIGLEC6    | 0.144  | 0.402  | 0.358 | 0.018599 |
| ENSG00000089558.4  | KCNH4      | 0.737  | 0.331  | 2.229 | 0.018821 |
| ENSG00000168634.4  | WFDC13     | 0.086  | 0.034  | 2.552 | 0.018962 |
| ENSG00000173714.7  | WFIKKN2    | 1.109  | 0.369  | 3.004 | 0.018964 |
| ENSG00000105383.10 | CD33       | 3.986  | 8.132  | 0.490 | 0.019101 |
| ENSG00000241295.1  | ZBTB20-AS2 | 0.534  | 1.524  | 0.350 | 0.019237 |
| ENSG00000205358.3  | MT1H       | 8.658  | 3.946  | 2.194 | 0.019397 |
| ENSG00000126583.6  | PRKCG      | 7.575  | 3.316  | 2.284 | 0.019407 |
| ENSG00000265264.1  | TIMM10B    | 0.357  | 0.128  | 2.795 | 0.019473 |
| ENSG00000255734.1  | HNRNPABP1  | 0.066  | 0.199  | 0.331 | 0.019511 |
| ENSG00000220868.2  | MRPL35P1   | 0.341  | 0.156  | 2.192 | 0.019618 |
| ENSG00000175793.10 | SFN        | 0.784  | 0.342  | 2.292 | 0.019672 |
| ENSG00000198153.7  | ZNF849P    | 0.063  | 0.024  | 2.593 | 0.019934 |
| ENSG00000197901.7  | SLC22A6    | 4.578  | 1.076  | 4.256 | 0.019936 |
| ENSG00000171954.8  | CYP4F22    | 0.025  | 0.074  | 0.345 | 0.020205 |
| ENSG00000233642.1  | GPR158-AS1 | 0.100  | 0.049  | 2.029 | 0.020424 |
| ENSG00000101280.6  | ANGPT4     | 1.011  | 0.502  | 2.014 | 0.020446 |
| ENSG00000183856.6  | IQGAP3     | 0.352  | 0.866  | 0.407 | 0.020525 |
| ENSG00000235489.3  | DBF4P1     | 0.141  | 0.055  | 2.555 | 0.020528 |
| ENSG00000162510.5  | MATN1      | 0.234  | 0.109  | 2.139 | 0.020957 |
| ENSG00000230539.1  | AOAH-IT1   | 0.239  | 0.529  | 0.451 | 0.021147 |
| ENSG00000256193.1  | LINC00507  | 2.060  | 0.721  | 2.858 | 0.021506 |
| ENSG00000196946.5  | ZNF705A    | 0.052  | 0.011  | 4.818 | 0.021808 |

|                    |           |        |        |       |          |
|--------------------|-----------|--------|--------|-------|----------|
| ENSG00000184185.5  | KCNJ12    | 1.818  | 0.802  | 2.266 | 0.021884 |
| ENSG00000120093.7  | HOXB3     | 0.341  | 0.784  | 0.434 | 0.021909 |
| ENSG00000151117.4  | TMEM86A   | 3.267  | 6.651  | 0.491 | 0.02197  |
| ENSG00000227766.1  | HCG4P5    | 0.915  | 2.096  | 0.437 | 0.022002 |
| ENSG00000268849.1  | SIGLEC22P | 0.564  | 1.187  | 0.475 | 0.022127 |
| ENSG00000123338.8  | NCKAP1L   | 12.876 | 26.771 | 0.481 | 0.0224   |
| ENSG00000187094.7  | CCK       | 38.377 | 17.314 | 2.217 | 0.022716 |
| ENSG00000152430.13 | BOLL      | 0.102  | 0.223  | 0.460 | 0.022842 |
| ENSG00000225781.1  | OR6V1     | 0.208  | 0.518  | 0.402 | 0.022859 |
| ENSG00000229570.2  | GAPDHP58  | 0.206  | 0.074  | 2.776 | 0.022971 |
| ENSG00000147571.3  | CRH       | 0.750  | 0.301  | 2.493 | 0.022987 |
| ENSG00000249206.2  | GCNT1P2   | 0.256  | 0.109  | 2.362 | 0.023202 |
| ENSG00000188985.5  | DHFRP1    | 0.092  | 0.035  | 2.618 | 0.023241 |
| ENSG00000237575.4  | PYY2      | 0.154  | 0.337  | 0.457 | 0.023647 |
| ENSG00000182048.7  | TRPC2     | 0.124  | 0.286  | 0.434 | 0.023745 |
| ENSG00000258956.2  | COX4I1P1  | 0.382  | 0.164  | 2.338 | 0.02391  |
| ENSG00000161640.11 | SIGLEC11  | 0.788  | 1.637  | 0.482 | 0.024011 |
| ENSG00000232901.1  | CYCSP10   | 0.667  | 1.406  | 0.474 | 0.024067 |
| ENSG00000132671.4  | SSTR4     | 0.268  | 0.121  | 2.217 | 0.024373 |
| ENSG00000184060.6  | ADAP2     | 13.831 | 28.044 | 0.493 | 0.024495 |
| ENSG00000221890.2  | NPTXR     | 31.510 | 13.989 | 2.253 | 0.024516 |
| ENSG00000106236.3  | NPTX2     | 17.779 | 5.529  | 3.215 | 0.025088 |
| ENSG00000100122.5  | CRYBB1    | 0.879  | 1.986  | 0.443 | 0.025235 |
| ENSG00000230453.5  | ANKRD18B  | 1.349  | 0.525  | 2.570 | 0.025815 |
| ENSG00000089169.10 | RPH3A     | 19.873 | 8.988  | 2.211 | 0.025923 |
| ENSG00000240014.2  | RN7SL254P | 1.003  | 0.464  | 2.163 | 0.026169 |
| ENSG00000095970.12 | TREM2     | 18.718 | 41.030 | 0.456 | 0.026339 |
| ENSG00000242285.1  | RPL6P8    | 0.082  | 0.221  | 0.370 | 0.02634  |
| ENSG00000158488.11 | CD1E      | 0.330  | 0.674  | 0.490 | 0.026659 |
| ENSG00000138413.9  | IDH1      | 16.933 | 41.071 | 0.412 | 0.026738 |
| ENSG00000253974.1  | NRG1-IT1  | 0.821  | 0.378  | 2.173 | 0.026848 |
| ENSG00000243547.1  | HNRNPKP4  | 0.048  | 0.021  | 2.322 | 0.027674 |
| ENSG00000156970.8  | BUB1B     | 0.706  | 1.780  | 0.397 | 0.027833 |
| ENSG00000225079.2  | FTH1P22   | 0.287  | 0.586  | 0.489 | 0.027941 |
| ENSG00000080986.8  | NDC80     | 0.758  | 1.637  | 0.463 | 0.028307 |
| ENSG00000268598.1  | VN1R80P   | 0.694  | 1.436  | 0.483 | 0.028491 |
| ENSG00000122223.8  | CD244     | 0.642  | 1.381  | 0.465 | 0.028492 |
| ENSG00000169218.9  | RSPO1     | 0.069  | 0.021  | 3.327 | 0.028715 |
| ENSG00000159173.14 | TNNI1     | 0.082  | 0.023  | 3.606 | 0.028744 |

|                    |           |        |        |       |          |
|--------------------|-----------|--------|--------|-------|----------|
| ENSG00000205002.3  | AARD      | 0.178  | 0.076  | 2.349 | 0.028754 |
| ENSG00000102239.4  | BRS3      | 0.036  | 0.012  | 3.005 | 0.028845 |
| ENSG00000172938.3  | MRGPRD    | 0.166  | 0.069  | 2.420 | 0.02889  |
| ENSG00000233261.1  | LINC00264 | 0.116  | 0.285  | 0.407 | 0.029358 |
| ENSG00000152213.3  | ARL11     | 0.662  | 1.324  | 0.500 | 0.029478 |
| ENSG00000235129.1  | FABP7P2   | 0.366  | 0.144  | 2.547 | 0.029613 |
| ENSG00000144481.12 | TRPM8     | 0.263  | 0.554  | 0.475 | 0.02981  |
| ENSG00000138160.4  | KIF11     | 0.705  | 1.469  | 0.480 | 0.029926 |
| ENSG00000154975.9  | CA10      | 7.075  | 3.355  | 2.109 | 0.030006 |
| ENSG00000197616.7  | MYH6      | 0.042  | 0.007  | 5.903 | 0.03013  |
| ENSG00000232417.5  | CT45A3    | 0.737  | 0.259  | 2.850 | 0.030538 |
| ENSG00000006116.3  | CACNG3    | 5.267  | 2.605  | 2.022 | 0.030579 |
| ENSG00000231784.4  | DBIL5P    | 0.984  | 0.481  | 2.045 | 0.030714 |
| ENSG00000171551.7  | ECEL1     | 0.264  | 0.112  | 2.350 | 0.030833 |
| ENSG00000271956.1  | DLX6-AS2  | 0.156  | 0.055  | 2.840 | 0.030847 |
| ENSG00000174946.5  | GPR171    | 2.984  | 1.466  | 2.036 | 0.031234 |
| ENSG00000211956.2  | IGHV4-34  | 0.406  | 3.321  | 0.122 | 0.0319   |
| ENSG00000256316.1  | HIST1H3F  | 4.580  | 13.161 | 0.348 | 0.031967 |
| ENSG00000135426.10 | TESPA1    | 9.804  | 4.885  | 2.007 | 0.031982 |
| ENSG00000211666.2  | IGLV2-14  | 2.394  | 17.935 | 0.133 | 0.032099 |
| ENSG00000143632.10 | ACTA1     | 1.716  | 0.525  | 3.268 | 0.032209 |
| ENSG00000185482.3  | STAC3     | 1.305  | 2.831  | 0.461 | 0.03234  |
| ENSG00000178999.8  | AURKB     | 0.541  | 1.346  | 0.402 | 0.03305  |
| ENSG00000174576.4  | NPAS4     | 20.761 | 5.020  | 4.136 | 0.033282 |
| ENSG00000222004.3  | C7orf71   | 0.109  | 0.229  | 0.474 | 0.033308 |
| ENSG00000074966.6  | TXK       | 0.865  | 1.896  | 0.457 | 0.033352 |
| ENSG00000235076.2  | GAPDHP52  | 0.129  | 0.274  | 0.472 | 0.033909 |
| ENSG00000184408.5  | KCND2     | 4.132  | 2.022  | 2.043 | 0.033992 |
| ENSG00000179363.6  | TMEM31    | 0.156  | 0.076  | 2.060 | 0.034254 |
| ENSG00000134115.8  | CNTN6     | 1.514  | 0.700  | 2.163 | 0.034266 |
| ENSG00000237152.2  | DLEU7-AS1 | 0.272  | 0.561  | 0.485 | 0.034298 |
| ENSG00000223414.2  | LINC00473 | 3.683  | 1.719  | 2.142 | 0.034442 |
| ENSG00000101825.7  | MXRA5     | 4.520  | 10.106 | 0.447 | 0.034526 |
| ENSG00000153303.12 | FRMD1     | 0.169  | 0.079  | 2.134 | 0.034726 |
| ENSG00000138778.7  | CENPE     | 0.649  | 1.351  | 0.480 | 0.034749 |
| ENSG00000119283.11 | TRIM67    | 0.636  | 0.261  | 2.438 | 0.034901 |
| ENSG00000105549.6  | THEG      | 0.100  | 0.042  | 2.373 | 0.035013 |
| ENSG00000240183.2  | RN7SL297P | 0.776  | 1.724  | 0.450 | 0.03507  |
| ENSG00000024526.12 | DEPDC1    | 0.188  | 0.506  | 0.371 | 0.035105 |

|                    |           |        |        |       |          |
|--------------------|-----------|--------|--------|-------|----------|
| ENSG00000079841.14 | RIMS1     | 18.421 | 8.261  | 2.230 | 0.035436 |
| ENSG00000171320.10 | ESCO2     | 0.314  | 0.919  | 0.342 | 0.035437 |
| ENSG00000134595.6  | SOX3      | 0.066  | 0.026  | 2.575 | 0.036208 |
| ENSG00000166863.7  | TAC3      | 2.912  | 1.451  | 2.007 | 0.036323 |
| ENSG00000227477.1  | STK4-AS1  | 0.088  | 0.178  | 0.495 | 0.036348 |
| ENSG00000183742.8  | MACC1     | 0.632  | 1.329  | 0.475 | 0.036704 |
| ENSG00000110148.5  | CCKBR     | 2.651  | 1.319  | 2.009 | 0.036785 |
| ENSG00000172724.7  | CCL19     | 37.792 | 18.598 | 2.032 | 0.037114 |
| ENSG00000134690.6  | CDCA8     | 0.348  | 0.696  | 0.499 | 0.037148 |
| ENSG00000101057.11 | MYBL2     | 0.328  | 1.144  | 0.287 | 0.037604 |
| ENSG00000003137.4  | CYP26B1   | 11.011 | 5.314  | 2.072 | 0.037625 |
| ENSG00000182611.3  | HIST1H2AJ | 2.379  | 8.581  | 0.277 | 0.037841 |
| ENSG00000175879.7  | HOXD8     | 0.131  | 0.382  | 0.342 | 0.037977 |
| ENSG00000145386.5  | CCNA2     | 0.605  | 1.394  | 0.434 | 0.038007 |
| ENSG00000167613.11 | LAIR1     | 21.365 | 43.614 | 0.490 | 0.038351 |
| ENSG00000163331.6  | DAPL1     | 2.548  | 1.117  | 2.281 | 0.038393 |
| ENSG00000178462.7  | TUBAL3    | 0.056  | 0.026  | 2.176 | 0.038525 |
| ENSG00000204291.6  | COL15A1   | 9.049  | 19.180 | 0.472 | 0.038643 |
| ENSG00000101292.6  | PROKR2    | 0.365  | 0.174  | 2.093 | 0.038752 |
| ENSG00000158402.14 | CDC25C    | 0.173  | 0.356  | 0.486 | 0.03892  |
| ENSG00000110975.4  | SYT10     | 0.378  | 0.181  | 2.094 | 0.039013 |
| ENSG00000206014.5  | OR7E161P  | 0.091  | 0.036  | 2.508 | 0.039249 |
| ENSG00000179046.4  | TRIML2    | 0.094  | 0.044  | 2.124 | 0.039313 |
| ENSG00000027644.4  | INSRR     | 1.075  | 0.528  | 2.037 | 0.039349 |
| ENSG00000130035.2  | GALNT8    | 2.436  | 1.134  | 2.149 | 0.039719 |
| ENSG00000218698.1  | ST13P16   | 0.165  | 0.079  | 2.105 | 0.040044 |
| ENSG00000211663.2  | IGLV3-19  | 1.086  | 6.359  | 0.171 | 0.040235 |
| ENSG00000186185.9  | KIF18B    | 0.271  | 0.647  | 0.418 | 0.040503 |
| ENSG00000168078.5  | PBK       | 0.188  | 0.768  | 0.245 | 0.040639 |
| ENSG00000182156.5  | ENPP7     | 0.046  | 0.109  | 0.428 | 0.040649 |
| ENSG00000066279.12 | ASPM      | 0.291  | 0.889  | 0.327 | 0.041036 |
| ENSG00000230316.2  | FEZF1-AS1 | 0.100  | 0.043  | 2.327 | 0.041518 |
| ENSG00000166183.11 | ASPG      | 0.251  | 0.121  | 2.082 | 0.041539 |
| ENSG00000148677.6  | ANKRD1    | 2.217  | 0.835  | 2.655 | 0.041548 |
| ENSG00000147432.2  | CHRNA3    | 0.413  | 0.171  | 2.409 | 0.041559 |
| ENSG00000236062.1  | GSTM5P1   | 0.222  | 0.099  | 2.254 | 0.041574 |
| ENSG00000182572.2  | HIST1H3I  | 4.752  | 14.066 | 0.338 | 0.042085 |
| ENSG00000211821.2  | TRDV2     | 0.191  | 0.522  | 0.365 | 0.042159 |
| ENSG00000142945.8  | KIF2C     | 0.632  | 1.278  | 0.494 | 0.042269 |

|                    |                     |        |        |       |          |
|--------------------|---------------------|--------|--------|-------|----------|
| ENSG00000196183.4  | RPS2P4              | 0.111  | 0.044  | 2.556 | 0.042341 |
| ENSG00000197153.3  | HIST1H3J            | 1.570  | 5.006  | 0.314 | 0.042527 |
| ENSG00000188778.3  | ADRB3               | 0.152  | 0.074  | 2.065 | 0.04265  |
| ENSG00000121933.13 | ADORA3              | 10.490 | 23.524 | 0.446 | 0.042746 |
| ENSG00000211788.2  | TRAV13-1            | 0.265  | 0.661  | 0.402 | 0.042902 |
| ENSG00000175325.2  | PROP1               | 0.091  | 0.035  | 2.587 | 0.043057 |
| ENSG00000196747.3  | HIST1H2AI           | 5.424  | 15.676 | 0.346 | 0.043415 |
| ENSG00000137077.3  | CCL21               | 5.297  | 2.603  | 2.035 | 0.043434 |
| ENSG00000240048.1  | DDX50P2             | 0.046  | 0.020  | 2.284 | 0.043601 |
| ENSG00000164794.4  | KCNV1               | 3.123  | 1.524  | 2.050 | 0.043622 |
| ENSG00000213423.4  | RBMX2P2             | 0.056  | 0.153  | 0.364 | 0.043692 |
| ENSG00000089199.5  | CHGB                | 23.824 | 11.731 | 2.031 | 0.043791 |
| ENSG00000196132.7  | MYT1                | 1.346  | 0.591  | 2.277 | 0.043805 |
| ENSG00000118193.7  | KIF14               | 0.173  | 0.451  | 0.384 | 0.043869 |
| ENSG00000243137.3  | PSG4                | 0.264  | 0.129  | 2.042 | 0.043903 |
| ENSG00000163395.12 | IGFN1               | 2.534  | 0.997  | 2.541 | 0.044013 |
| ENSG00000148773.8  | MKI67               | 0.722  | 2.334  | 0.310 | 0.044175 |
| ENSG00000132821.7  | VSTM2L              | 14.679 | 7.060  | 2.079 | 0.044221 |
| ENSG00000134762.12 | DSC3                | 0.301  | 0.134  | 2.252 | 0.044448 |
| ENSG00000198558.2  | HIST1H4L            | 4.528  | 10.743 | 0.421 | 0.044712 |
| ENSG00000258548.1  | LINC00645           | 0.111  | 0.052  | 2.120 | 0.044796 |
| ENSG00000135625.6  | EGR4                | 7.491  | 2.233  | 3.355 | 0.044845 |
| ENSG00000159166.9  | LAD1                | 0.096  | 0.221  | 0.436 | 0.044938 |
| ENSG00000240541.2  | TM4SF1-AS1          | 0.234  | 0.115  | 2.031 | 0.044952 |
| ENSG00000118640.6  | VAMP8               | 18.034 | 40.739 | 0.443 | 0.045152 |
| ENSG00000258555.2  | SPECC1L<br>-ADORA2A | 0.308  | 0.145  | 2.121 | 0.045191 |
| ENSG00000215475.3  | SIAH3               | 0.750  | 0.347  | 2.160 | 0.045421 |
| ENSG00000169777.5  | TAS2R1              | 0.085  | 0.041  | 2.091 | 0.045447 |
| ENSG00000211940.2  | IGHV3-9             | 0.432  | 3.591  | 0.120 | 0.045465 |
| ENSG00000232144.1  | PSAT1P2             | 0.064  | 0.160  | 0.397 | 0.045582 |
| ENSG00000234611.1  | OR2AT2P             | 0.082  | 0.038  | 2.170 | 0.045695 |
| ENSG00000250305.4  | KIAA1456            | 10.051 | 4.379  | 2.295 | 0.045773 |
| ENSG00000198829.5  | SUCNR1              | 0.568  | 2.760  | 0.206 | 0.046493 |
| ENSG00000109193.6  | SULT1E1             | 0.052  | 0.267  | 0.196 | 0.046551 |
| ENSG00000010327.6  | STAB1               | 38.073 | 83.408 | 0.456 | 0.046582 |
| ENSG00000242076.1  | IGKV1-33            | 1.408  | 8.014  | 0.176 | 0.04668  |
| ENSG00000203747.5  | FCGR3A              | 29.148 | 59.196 | 0.492 | 0.046691 |
| ENSG00000174083.13 | PIK3R6              | 0.767  | 1.644  | 0.467 | 0.046905 |

|                    |           |        |        |       |          |
|--------------------|-----------|--------|--------|-------|----------|
| ENSG00000157456.3  | CCNB2     | 0.747  | 1.738  | 0.430 | 0.047054 |
| ENSG00000090889.10 | KIF4A     | 0.348  | 0.749  | 0.465 | 0.047117 |
| ENSG00000231211.2  | RPL17P49  | 0.601  | 0.242  | 2.480 | 0.047247 |
| ENSG00000004809.9  | SLC22A16  | 0.147  | 0.379  | 0.389 | 0.047269 |
| ENSG00000255833.1  | TIFAB     | 0.092  | 0.264  | 0.349 | 0.047368 |
| ENSG00000174600.9  | CMKLR1    | 10.782 | 21.840 | 0.494 | 0.047391 |
| ENSG00000007968.6  | E2F2      | 0.201  | 0.429  | 0.469 | 0.04743  |
| ENSG00000077009.9  | NMRK2     | 0.163  | 0.066  | 2.480 | 0.047639 |
| ENSG00000258477.1  | PPIAP6    | 0.198  | 0.399  | 0.496 | 0.047861 |
| ENSG00000237697.2  | LINC00312 | 4.808  | 2.322  | 2.070 | 0.047967 |
| ENSG00000239577.2  | RN7SL388P | 0.377  | 0.873  | 0.432 | 0.048326 |
| ENSG00000111206.8  | FOXMI     | 1.075  | 2.322  | 0.463 | 0.04834  |
| ENSG00000122859.4  | NEUROG3   | 0.063  | 0.031  | 2.050 | 0.048365 |
| ENSG00000189430.8  | NCR1      | 0.239  | 0.496  | 0.481 | 0.048619 |
| ENSG00000130701.3  | RBBP8NL   | 0.057  | 0.019  | 2.971 | 0.048691 |
| ENSG00000198374.3  | HIST1H2AL | 3.302  | 9.059  | 0.365 | 0.048731 |
| ENSG00000126787.8  | DLGAP5    | 0.282  | 1.026  | 0.275 | 0.048794 |
| ENSG00000100721.6  | TCL1A     | 0.149  | 0.373  | 0.401 | 0.049107 |
| ENSG00000134757.4  | DSG3      | 0.040  | 0.009  | 4.308 | 0.04915  |
| ENSG00000197459.2  | HIST1H2BH | 5.450  | 14.621 | 0.373 | 0.049397 |
| ENSG00000197629.5  | MPEG1     | 13.408 | 29.311 | 0.457 | 0.049451 |
| ENSG00000215498.4  | FAM230B   | 0.057  | 0.021  | 2.649 | 0.049883 |

FPKM Indicates fragments per kilobase of exon per million fragments mapped; LFR, low flow rate; HFR, high flow rate; FC, fold change.

**Table S3. GO and KEGG analysis enriched by upregulated genes in low flow rate bAVMs.**

| GeneSet    | Description                                                               | P value  |
|------------|---------------------------------------------------------------------------|----------|
| GO:0042127 | regulation of cell proliferation                                          | 7.37E-05 |
| GO:0050727 | regulation of inflammatory response                                       | 7.72E-05 |
| GO:0007267 | cell-cell signaling                                                       | 8.05E-05 |
| GO:0032103 | positive regulation of response to external stimulus                      | 1.41E-04 |
| GO:0061888 | regulation of astrocyte activation                                        | 1.49E-04 |
| GO:0033993 | response to lipid                                                         | 1.59E-04 |
| GO:0050729 | positive regulation of inflammatory response                              | 1.63E-04 |
| GO:0032101 | regulation of response to external stimulus                               | 1.76E-04 |
| GO:0002675 | positive regulation of acute inflammatory response                        | 1.93E-04 |
| GO:0038031 | non-canonical Wnt signaling pathway via JNK cascade                       | 2.22E-04 |
| GO:0008285 | negative regulation of cell proliferation                                 | 2.41E-04 |
| GO:0009914 | hormone transport                                                         | 2.51E-04 |
| GO:0038030 | non-canonical Wnt signaling pathway via MAPK cascade                      | 3.11E-04 |
| GO:2000381 | negative regulation of mesoderm development                               | 4.13E-04 |
| GO:0002673 | regulation of acute inflammatory response                                 | 4.55E-04 |
| GO:1901700 | response to oxygen-containing compound                                    | 7.80E-04 |
| GO:0043030 | regulation of macrophage activation                                       | 9.74E-04 |
| GO:0032722 | positive regulation of chemokine production                               | 0.001032 |
| GO:0008283 | cell proliferation                                                        | 0.00125  |
| GO:0010469 | regulation of signaling receptor activity                                 | 0.001306 |
| GO:0046879 | hormone secretion                                                         | 0.001341 |
| GO:0046677 | response to antibiotic                                                    | 0.001431 |
| GO:0048143 | astrocyte activation                                                      | 0.001522 |
| GO:1903978 | regulation of microglial cell activation                                  | 0.001522 |
| GO:0042074 | cell migration involved in gastrulation                                   | 0.001522 |
| GO:0007188 | adenylate cyclase-modulating G protein-coupled receptor signaling pathway | 0.001535 |
| GO:0046887 | positive regulation of hormone secretion                                  | 0.001611 |
| GO:0042542 | response to hydrogen peroxide                                             | 0.001705 |
| GO:0006954 | inflammatory response                                                     | 0.001775 |
| GO:0007189 | adenylate cyclase-activating G protein-coupled receptor signaling pathway | 0.001903 |
| GO:2000380 | regulation of mesoderm development                                        | 0.001962 |
| GO:0043491 | protein kinase B signaling                                                | 0.002099 |
| GO:0010647 | positive regulation of cell communication                                 | 0.002304 |
| GO:1902533 | positive regulation of intracellular signal transduction                  | 0.002304 |
| GO:0008284 | positive regulation of cell proliferation                                 | 0.002369 |



|            |                                                                                             |          |
|------------|---------------------------------------------------------------------------------------------|----------|
| GO:0023056 | positive regulation of signaling                                                            | 0.002384 |
| GO:0023019 | signal transduction involved in regulation of gene expression                               | 0.00272  |
| GO:0051384 | response to glucocorticoid                                                                  | 0.002723 |
| GO:0030072 | peptide hormone secretion                                                                   | 0.002753 |
| GO:0032642 | regulation of chemokine production                                                          | 0.002788 |
| GO:0007187 | G protein-coupled receptor signaling pathway, coupled to cyclic nucleotide second messenger | 0.002899 |
| GO:1900120 | regulation of receptor binding                                                              | 0.002999 |
| GO:0043567 | regulation of insulin-like growth factor receptor signaling pathway                         | 0.002999 |
| GO:0002526 | acute inflammatory response                                                                 | 0.003067 |
| GO:0045597 | positive regulation of cell differentiation                                                 | 0.003124 |
| GO:0003018 | vascular process in circulatory system                                                      | 0.003139 |
| GO:0009636 | response to toxic substance                                                                 | 0.003216 |
| GO:1903532 | positive regulation of secretion by cell                                                    | 0.003415 |
| GO:0051897 | positive regulation of protein kinase B signaling                                           | 0.003439 |
| GO:0032602 | chemokine production                                                                        | 0.003626 |
| GO:0042116 | macrophage activation                                                                       | 0.003626 |
| GO:0014068 | positive regulation of phosphatidylinositol 3-kinase signaling                              | 0.003626 |
| GO:0046883 | regulation of hormone secretion                                                             | 0.003779 |
| GO:0010817 | regulation of hormone levels                                                                | 0.003867 |
| GO:0002793 | positive regulation of peptide secretion                                                    | 0.003901 |
| GO:0150077 | regulation of neuroinflammatory response                                                    | 0.003912 |
| GO:0031960 | response to corticosteroid                                                                  | 0.00401  |
| GO:0051240 | positive regulation of multicellular organismal process                                     | 0.004233 |
| GO:0001934 | positive regulation of protein phosphorylation                                              | 0.004496 |
| GO:0007369 | gastrulation                                                                                | 0.004835 |
| GO:0042493 | response to drug                                                                            | 0.004895 |
| GO:0051047 | positive regulation of secretion                                                            | 0.004959 |
| GO:0032958 | inositol phosphate biosynthetic process                                                     | 0.005305 |
| GO:0048710 | regulation of astrocyte differentiation                                                     | 0.005305 |
| GO:0019933 | cAMP-mediated signaling                                                                     | 0.005339 |
| GO:0044093 | positive regulation of molecular function                                                   | 0.005686 |
| GO:0031347 | regulation of defense response                                                              | 0.005728 |
| GO:0080134 | regulation of response to stress                                                            | 0.005846 |
| GO:0090277 | positive regulation of peptide hormone secretion                                            | 0.005898 |
| GO:0007202 | activation of phospholipase C activity                                                      | 0.006074 |
| GO:0042327 | positive regulation of phosphorylation                                                      | 0.006182 |

|            |                                                        |          |
|------------|--------------------------------------------------------|----------|
| GO:0060251 | regulation of glial cell proliferation                 | 0.006477 |
| GO:0001774 | microglial cell activation                             | 0.006477 |
| GO:0002269 | leukocyte activation involved in inflammatory response | 0.006477 |
| GO:0048333 | mesodermal cell differentiation                        | 0.006477 |
| GO:0021782 | glial cell development                                 | 0.006619 |
| GO:0019932 | second-messenger-mediated signaling                    | 0.006743 |
| GO:0009967 | positive regulation of signal transduction             | 0.006881 |
| GO:0043114 | regulation of vascular permeability                    | 0.006891 |
| GO:0007218 | neuropeptide signaling pathway                         | 0.007192 |
| GO:0014002 | astrocyte development                                  | 0.007317 |
| GO:0035567 | non-canonical Wnt signaling pathway                    | 0.00739  |
| GO:0048009 | insulin-like growth factor receptor signaling pathway  | 0.007755 |
| GO:0009719 | response to endogenous stimulus                        | 0.007833 |
| GO:0071396 | cellular response to lipid                             | 0.008143 |
| GO:0032956 | regulation of actin cytoskeleton organization          | 0.008165 |
| GO:0060416 | response to growth hormone                             | 0.008205 |
| GO:0051345 | positive regulation of hydrolase activity              | 0.008231 |
| GO:0090276 | regulation of peptide hormone secretion                | 0.008392 |
| GO:0030073 | insulin secretion                                      | 0.008533 |
| GO:0023061 | signal release                                         | 0.008599 |
| GO:0016055 | Wnt signaling pathway                                  | 0.008599 |
| GO:0051896 | regulation of protein kinase B signaling               | 0.008676 |
| GO:0019935 | cyclic-nucleotide-mediated signaling                   | 0.008821 |
| GO:0198738 | cell-cell signaling by Wnt                             | 0.008865 |
| GO:0014013 | regulation of gliogenesis                              | 0.009086 |
| GO:0002791 | regulation of peptide secretion                        | 0.00923  |
| GO:0061061 | muscle structure development                           | 0.009435 |
| GO:0010562 | positive regulation of phosphorus metabolic process    | 0.009603 |
| GO:0045937 | positive regulation of phosphate metabolic process     | 0.009603 |
| GO:0061900 | glial cell activation                                  | 0.009622 |
| GO:0001704 | formation of primary germ layer                        | 0.009776 |
| GO:0014066 | regulation of phosphatidylinositol 3-kinase signaling  | 0.009776 |
| GO:0051247 | positive regulation of protein metabolic process       | 0.00981  |
| GO:0000302 | response to reactive oxygen species                    | 0.009878 |
| GO:0014014 | negative regulation of gliogenesis                     | 0.010622 |
| GO:0007186 | G protein-coupled receptor signaling pathway           | 0.010641 |
| GO:0014009 | glial cell proliferation                               | 0.011139 |
| GO:0032880 | regulation of protein localization                     | 0.011502 |
| GO:0010863 | positive regulation of phospholipase C activity        | 0.011667 |

|            |                                                                  |          |
|------------|------------------------------------------------------------------|----------|
| GO:0042551 | neuron maturation                                                | 0.011667 |
| GO:0009725 | response to hormone                                              | 0.011949 |
| GO:0051094 | positive regulation of developmental process                     | 0.012115 |
| GO:0042325 | regulation of phosphorylation                                    | 0.012309 |
| GO:0019220 | regulation of phosphate metabolic process                        | 0.012449 |
| GO:0007498 | mesoderm development                                             | 0.012564 |
| GO:0051174 | regulation of phosphorus metabolic process                       | 0.012566 |
| GO:0097305 | response to alcohol                                              | 0.012595 |
| GO:0002437 | inflammatory response to antigenic stimulus                      | 0.012755 |
| GO:0032355 | response to estradiol                                            | 0.013114 |
| GO:1900274 | regulation of phospholipase C activity                           | 0.013315 |
| GO:0009790 | embryo development                                               | 0.01337  |
| GO:0032970 | regulation of actin filament-based process                       | 0.013409 |
| GO:0006952 | defense response                                                 | 0.013445 |
| GO:0044703 | multi-organism reproductive process                              | 0.01387  |
| GO:0034260 | negative regulation of GTPase activity                           | 0.013885 |
| GO:2000026 | regulation of multicellular organismal development               | 0.013948 |
| GO:0050921 | positive regulation of chemotaxis                                | 0.014257 |
| GO:0045944 | positive regulation of transcription by RNA polymerase II        | 0.01449  |
| GO:0051962 | positive regulation of nervous system development                | 0.014613 |
| GO:0045860 | positive regulation of protein kinase activity                   | 0.014742 |
| GO:0001503 | ossification                                                     | 0.014773 |
| GO:0009991 | response to extracellular stimulus                               | 0.015002 |
| GO:0010720 | positive regulation of cell development                          | 0.015002 |
| GO:0150076 | neuroinflammatory response                                       | 0.015058 |
| GO:0032270 | positive regulation of cellular protein metabolic process        | 0.015156 |
| GO:0007169 | transmembrane receptor protein tyrosine kinase signaling pathway | 0.015904 |
| GO:0050714 | positive regulation of protein secretion                         | 0.016177 |
| GO:0001706 | endoderm formation                                               | 0.016271 |
| GO:0031401 | positive regulation of protein modification process              | 0.016332 |
| GO:0014065 | phosphatidylinositol 3-kinase signaling                          | 0.016389 |
| GO:0043085 | positive regulation of catalytic activity                        | 0.016987 |
| GO:0051091 | positive regulation of DNA-binding transcription factor activity | 0.0175   |
| GO:0048545 | response to steroid hormone                                      | 0.017599 |
| GO:0001932 | regulation of protein phosphorylation                            | 0.017665 |
| GO:0035051 | cardiocyte differentiation                                       | 0.017683 |
| GO:0008277 | regulation of G protein-coupled receptor signaling               | 0.01869  |

|            |                                                                                                          |          |
|------------|----------------------------------------------------------------------------------------------------------|----------|
|            | pathway                                                                                                  |          |
| GO:0002865 | negative regulation of acute inflammatory response to antigenic stimulus                                 | 0.019354 |
| GO:0071651 | positive regulation of chemokine (C-C motif) ligand 5 production                                         | 0.019354 |
| GO:0090118 | receptor-mediated endocytosis involved in cholesterol transport                                          | 0.019354 |
| GO:0031547 | brain-derived neurotrophic factor receptor signaling pathway                                             | 0.019354 |
| GO:0080184 | response to phenylpropanoid                                                                              | 0.019354 |
| GO:0003307 | regulation of Wnt signaling pathway involved in heart development                                        | 0.019354 |
| GO:1904352 | positive regulation of protein catabolic process in the vacuole                                          | 0.019354 |
| GO:0030263 | apoptotic chromosome condensation                                                                        | 0.019354 |
| GO:0010641 | positive regulation of platelet-derived growth factor receptor signaling pathway                         | 0.019354 |
| GO:0060664 | epithelial cell proliferation involved in salivary gland morphogenesis                                   | 0.019354 |
| GO:2000660 | negative regulation of interleukin-1-mediated signaling pathway                                          | 0.019354 |
| GO:1900223 | positive regulation of amyloid-beta clearance                                                            | 0.019354 |
| GO:1900145 | regulation of nodal signaling pathway involved in determination of left/right asymmetry                  | 0.019354 |
| GO:1900175 | regulation of nodal signaling pathway involved in determination of lateral mesoderm left/right asymmetry | 0.019354 |
| GO:0038169 | somatostatin receptor signaling pathway                                                                  | 0.019354 |
| GO:0038170 | somatostatin signaling pathway                                                                           | 0.019354 |
| GO:0071557 | histone H3-K27 demethylation                                                                             | 0.019354 |
| GO:0043410 | positive regulation of MAPK cascade                                                                      | 0.019444 |
| GO:0042063 | gliogenesis                                                                                              | 0.019851 |
| GO:0009306 | protein secretion                                                                                        | 0.020076 |
| GO:0051960 | regulation of nervous system development                                                                 | 0.020487 |
| GO:0033674 | positive regulation of kinase activity                                                                   | 0.02056  |
| GO:0070555 | response to interleukin-1                                                                                | 0.020799 |
| GO:1903530 | regulation of secretion by cell                                                                          | 0.020818 |
| GO:0030029 | actin filament-based process                                                                             | 0.020961 |
| GO:1905114 | cell surface receptor signaling pathway involved in cell-cell signaling                                  | 0.021383 |
| GO:0010518 | positive regulation of phospholipase activity                                                            | 0.021524 |

|            |                                                                                             |          |
|------------|---------------------------------------------------------------------------------------------|----------|
| GO:0046173 | polyol biosynthetic process                                                                 | 0.021524 |
| GO:1902531 | regulation of intracellular signal transduction                                             | 0.022305 |
| GO:1901701 | cellular response to oxygen-containing compound                                             | 0.022926 |
| GO:0071385 | cellular response to glucocorticoid stimulus                                                | 0.022933 |
| GO:0010986 | positive regulation of lipoprotein particle clearance                                       | 0.02318  |
| GO:0060696 | regulation of phospholipid catabolic process                                                | 0.02318  |
| GO:0043569 | negative regulation of insulin-like growth factor receptor signaling pathway                | 0.02318  |
| GO:0060770 | negative regulation of epithelial cell proliferation involved in prostate gland development | 0.02318  |
| GO:0001957 | intramembranous ossification                                                                | 0.02318  |
| GO:0036072 | direct ossification                                                                         | 0.02318  |
| GO:1904587 | response to glycoprotein                                                                    | 0.02318  |
| GO:0098914 | membrane repolarization during atrial cardiac muscle cell action potential                  | 0.02318  |
| GO:2000553 | positive regulation of T-helper 2 cell cytokine production                                  | 0.02318  |
| GO:0003160 | endocardium morphogenesis                                                                   | 0.02318  |
| GO:0150079 | negative regulation of neuroinflammatory response                                           | 0.02318  |
| GO:0009996 | negative regulation of cell fate specification                                              | 0.02318  |
| GO:0048598 | embryonic morphogenesis                                                                     | 0.023629 |
| GO:0051093 | negative regulation of developmental process                                                | 0.023916 |
| GO:0045685 | regulation of glial cell differentiation                                                    | 0.025116 |
| GO:0031349 | positive regulation of defense response                                                     | 0.025388 |
| GO:0048015 | phosphatidylinositol-mediated signaling                                                     | 0.025394 |
| GO:0043408 | regulation of MAPK cascade                                                                  | 0.025551 |
| GO:0002790 | peptide secretion                                                                           | 0.02565  |
| GO:0071384 | cellular response to corticosteroid stimulus                                                | 0.025862 |
| GO:0061371 | determination of heart left/right asymmetry                                                 | 0.025862 |
| GO:0034097 | response to cytokine                                                                        | 0.026275 |
| GO:0014823 | response to activity                                                                        | 0.026617 |
| GO:0048017 | inositol lipid-mediated signaling                                                           | 0.026622 |
| GO:0003348 | cardiac endothelial cell differentiation                                                    | 0.026992 |
| GO:0060956 | endocardial cell differentiation                                                            | 0.026992 |
| GO:1903997 | positive regulation of non-membrane spanning protein tyrosine kinase activity               | 0.026992 |
| GO:0015793 | glycerol transport                                                                          | 0.026992 |
| GO:0042661 | regulation of mesodermal cell fate specification                                            | 0.026992 |
| GO:1905770 | regulation of mesodermal cell differentiation                                               | 0.026992 |
| GO:1905902 | regulation of mesoderm formation                                                            | 0.026992 |
| GO:0060372 | regulation of atrial cardiac muscle cell membrane                                           | 0.026992 |

|            |                                                                                                              |          |
|------------|--------------------------------------------------------------------------------------------------------------|----------|
|            | repolarization                                                                                               |          |
| GO:0086028 | bundle of His cell to Purkinje myocyte signaling                                                             | 0.026992 |
| GO:0086043 | bundle of His cell action potential                                                                          | 0.026992 |
| GO:2000542 | negative regulation of gastrulation                                                                          | 0.026992 |
| GO:0071694 | maintenance of protein location in extracellular region                                                      | 0.026992 |
| GO:0035766 | cell chemotaxis to fibroblast growth factor                                                                  | 0.026992 |
| GO:0035768 | endothelial cell chemotaxis to fibroblast growth factor                                                      | 0.026992 |
| GO:1904847 | regulation of cell chemotaxis to fibroblast growth factor                                                    | 0.026992 |
| GO:2000544 | regulation of endothelial cell chemotaxis to fibroblast growth factor                                        | 0.026992 |
| GO:0009249 | protein lipoylation                                                                                          | 0.026992 |
| GO:0099004 | calmodulin dependent kinase signaling pathway                                                                | 0.026992 |
| GO:2000659 | regulation of interleukin-1-mediated signaling pathway                                                       | 0.026992 |
| GO:0002826 | negative regulation of T-helper 1 type immune response                                                       | 0.026992 |
| GO:0038107 | nodal signaling pathway involved in determination of left/right asymmetry                                    | 0.026992 |
| GO:1900094 | regulation of transcription from RNA polymerase II promoter involved in determination of left/right symmetry | 0.026992 |
| GO:1900164 | nodal signaling pathway involved in determination of lateral mesoderm left/right asymmetry                   | 0.026992 |
| GO:0045162 | clustering of voltage-gated sodium channels                                                                  | 0.026992 |
| GO:0001826 | inner cell mass cell differentiation                                                                         | 0.026992 |
| GO:0051965 | positive regulation of synapse assembly                                                                      | 0.027381 |
| GO:0050708 | regulation of protein secretion                                                                              | 0.027456 |
| GO:0051050 | positive regulation of transport                                                                             | 0.02789  |
| GO:0001707 | mesoderm formation                                                                                           | 0.028153 |
| GO:0045893 | positive regulation of transcription, DNA-templated                                                          | 0.02934  |
| GO:0060193 | positive regulation of lipase activity                                                                       | 0.029725 |
| GO:0048332 | mesoderm morphogenesis                                                                                       | 0.029725 |
| GO:0043647 | inositol phosphate metabolic process                                                                         | 0.029725 |
| GO:0045595 | regulation of cell differentiation                                                                           | 0.029888 |
| GO:0051046 | regulation of secretion                                                                                      | 0.030057 |
| GO:0050769 | positive regulation of neurogenesis                                                                          | 0.030126 |
| GO:0050796 | regulation of insulin secretion                                                                              | 0.030493 |
| GO:0048708 | astrocyte differentiation                                                                                    | 0.030523 |
| GO:0010517 | regulation of phospholipase activity                                                                         | 0.030523 |
| GO:0060350 | endochondral bone morphogenesis                                                                              | 0.030523 |
| GO:0007417 | central nervous system development                                                                           | 0.030618 |
| GO:0061476 | response to anticoagulant                                                                                    | 0.030789 |
| GO:0070444 | oligodendrocyte progenitor proliferation                                                                     | 0.030789 |

|            |                                                                      |          |
|------------|----------------------------------------------------------------------|----------|
| GO:0070445 | regulation of oligodendrocyte progenitor proliferation               | 0.030789 |
| GO:1903995 | regulation of non-membrane spanning protein tyrosine kinase activity | 0.030789 |
| GO:0071692 | protein localization to extracellular region                         | 0.030789 |
| GO:0001781 | neutrophil apoptotic process                                         | 0.030789 |
| GO:0034638 | phosphatidylcholine catabolic process                                | 0.030789 |
| GO:1905906 | regulation of amyloid fibril formation                               | 0.030789 |
| GO:2000288 | positive regulation of myoblast proliferation                        | 0.030789 |
| GO:0070327 | thyroid hormone transport                                            | 0.030789 |
| GO:1900107 | regulation of nodal signaling pathway                                | 0.030789 |
| GO:1905165 | regulation of lysosomal protein catabolic process                    | 0.030789 |
| GO:0003140 | determination of left/right asymmetry in lateral mesoderm            | 0.030789 |
| GO:0001714 | endodermal cell fate specification                                   | 0.030789 |
| GO:0032024 | positive regulation of insulin secretion                             | 0.03133  |
| GO:0043507 | positive regulation of JUN kinase activity                           | 0.032146 |
| GO:0031328 | positive regulation of cellular biosynthetic process                 | 0.032269 |
| GO:0007422 | peripheral nervous system development                                | 0.033802 |
| GO:0007492 | endoderm development                                                 | 0.033802 |
| GO:0048262 | determination of dorsal/ventral asymmetry                            | 0.034571 |
| GO:0048263 | determination of dorsal identity                                     | 0.034571 |
| GO:0048617 | embryonic foregut morphogenesis                                      | 0.034571 |
| GO:0035907 | dorsal aorta development                                             | 0.034571 |
| GO:0042117 | monocyte activation                                                  | 0.034571 |
| GO:0060124 | positive regulation of growth hormone secretion                      | 0.034571 |
| GO:0071649 | regulation of chemokine (C-C motif) ligand 5 production              | 0.034571 |
| GO:0051901 | positive regulation of mitochondrial depolarization                  | 0.034571 |
| GO:0086015 | SA node cell action potential                                        | 0.034571 |
| GO:0086018 | SA node cell to atrial cardiac muscle cell signaling                 | 0.034571 |
| GO:1900122 | positive regulation of receptor binding                              | 0.034571 |
| GO:0035376 | sterol import                                                        | 0.034571 |
| GO:0070508 | cholesterol import                                                   | 0.034571 |
| GO:0034382 | chylomicron remnant clearance                                        | 0.034571 |
| GO:0071830 | triglyceride-rich lipoprotein particle clearance                     | 0.034571 |
| GO:1900221 | regulation of amyloid-beta clearance                                 | 0.034571 |
| GO:0048865 | stem cell fate commitment                                            | 0.034571 |
| GO:2000674 | regulation of type B pancreatic cell apoptotic process               | 0.034571 |
| GO:2000035 | regulation of stem cell division                                     | 0.034571 |
| GO:0035581 | sequestering of extracellular ligand from receptor                   | 0.034571 |
| GO:0040011 | locomotion                                                           | 0.034827 |

|            |                                                                                    |          |
|------------|------------------------------------------------------------------------------------|----------|
| GO:0051347 | positive regulation of transferase activity                                        | 0.034886 |
| GO:0050731 | positive regulation of peptidyl-tyrosine phosphorylation                           | 0.035124 |
| GO:0032496 | response to lipopolysaccharide                                                     | 0.035164 |
| GO:0048585 | negative regulation of response to stimulus                                        | 0.035544 |
| GO:0009891 | positive regulation of biosynthetic process                                        | 0.03601  |
| GO:0008015 | blood circulation                                                                  | 0.036511 |
| GO:1901654 | response to ketone                                                                 | 0.037568 |
| GO:0007167 | enzyme linked receptor protein signaling pathway                                   | 0.037757 |
| GO:0046470 | phosphatidylcholine metabolic process                                              | 0.038084 |
| GO:0032926 | negative regulation of activin receptor signaling pathway                          | 0.038339 |
| GO:0007440 | foregut morphogenesis                                                              | 0.038339 |
| GO:0071609 | chemokine (C-C motif) ligand 5 production                                          | 0.038339 |
| GO:0031340 | positive regulation of vesicle fusion                                              | 0.038339 |
| GO:0086070 | SA node cell to atrial cardiac muscle cell communication                           | 0.038339 |
| GO:0060768 | regulation of epithelial cell proliferation involved in prostate gland development | 0.038339 |
| GO:2000551 | regulation of T-helper 2 cell cytokine production                                  | 0.038339 |
| GO:0051481 | negative regulation of cytosolic calcium ion concentration                         | 0.038339 |
| GO:0048672 | positive regulation of collateral sprouting                                        | 0.038339 |
| GO:0003306 | Wnt signaling pathway involved in heart development                                | 0.038339 |
| GO:2000833 | positive regulation of steroid hormone secretion                                   | 0.038339 |
| GO:0099624 | atrial cardiac muscle cell membrane repolarization                                 | 0.038339 |
| GO:0097050 | type B pancreatic cell apoptotic process                                           | 0.038339 |
| GO:1904350 | regulation of protein catabolic process in the vacuole                             | 0.038339 |
| GO:0070091 | glucagon secretion                                                                 | 0.038339 |
| GO:0030432 | peristalsis                                                                        | 0.038339 |
| GO:0007028 | cytoplasm organization                                                             | 0.038339 |
| GO:0032966 | negative regulation of collagen biosynthetic process                               | 0.038339 |
| GO:0006928 | movement of cell or subcellular component                                          | 0.038402 |
| GO:0032755 | positive regulation of interleukin-6 production                                    | 0.038964 |
| GO:0003013 | circulatory system process                                                         | 0.039106 |
| GO:0002237 | response to molecule of bacterial origin                                           | 0.039825 |
| GO:0021766 | hippocampus development                                                            | 0.039852 |
| GO:0019953 | sexual reproduction                                                                | 0.039962 |
| GO:0050878 | regulation of body fluid levels                                                    | 0.039996 |
| GO:0031667 | response to nutrient levels                                                        | 0.039996 |
| GO:0010001 | glial cell differentiation                                                         | 0.041134 |
| GO:1903508 | positive regulation of nucleic acid-templated transcription                        | 0.041338 |
| GO:1902680 | positive regulation of RNA biosynthetic process                                    | 0.041499 |



|            |                                                                      |          |
|------------|----------------------------------------------------------------------|----------|
| GO:0030155 | regulation of cell adhesion                                          | 0.041767 |
| GO:0002862 | negative regulation of inflammatory response to antigenic stimulus   | 0.042092 |
| GO:1904181 | positive regulation of membrane depolarization                       | 0.042092 |
| GO:0040015 | negative regulation of multicellular organism growth                 | 0.042092 |
| GO:0016322 | neuron remodeling                                                    | 0.042092 |
| GO:0015791 | polyol transport                                                     | 0.042092 |
| GO:0060767 | epithelial cell proliferation involved in prostate gland development | 0.042092 |
| GO:0045073 | regulation of chemokine biosynthetic process                         | 0.042092 |
| GO:0060992 | response to fungicide                                                | 0.042092 |
| GO:0009629 | response to gravity                                                  | 0.042092 |
| GO:0032494 | response to peptidoglycan                                            | 0.042092 |
| GO:0010713 | negative regulation of collagen metabolic process                    | 0.042092 |
| GO:0018065 | protein-cofactor linkage                                             | 0.042092 |
| GO:0048712 | negative regulation of astrocyte differentiation                     | 0.042092 |
| GO:1905146 | lysosomal protein catabolic process                                  | 0.042092 |
| GO:0010454 | negative regulation of cell fate commitment                          | 0.042092 |
| GO:0002690 | positive regulation of leukocyte chemotaxis                          | 0.042561 |
| GO:1903725 | regulation of phospholipid metabolic process                         | 0.042561 |
| GO:0051130 | positive regulation of cellular component organization               | 0.043009 |
| GO:0070301 | cellular response to hydrogen peroxide                               | 0.04348  |
| GO:0043549 | regulation of kinase activity                                        | 0.043614 |
| GO:0022414 | reproductive process                                                 | 0.04428  |
| GO:0043506 | regulation of JUN kinase activity                                    | 0.044405 |
| GO:0000003 | reproduction                                                         | 0.044823 |
| GO:0001649 | osteoblast differentiation                                           | 0.044866 |
| GO:0051493 | regulation of cytoskeleton organization                              | 0.045272 |
| GO:0072359 | circulatory system development                                       | 0.045303 |
| GO:0038166 | angiotensin-activated signaling pathway                              | 0.045831 |
| GO:0060911 | cardiac cell fate commitment                                         | 0.045831 |
| GO:0003157 | endocardium development                                              | 0.045831 |
| GO:0002523 | leukocyte migration involved in inflammatory response                | 0.045831 |
| GO:0038003 | opioid receptor signaling pathway                                    | 0.045831 |
| GO:0002674 | negative regulation of acute inflammatory response                   | 0.045831 |
| GO:0030950 | establishment or maintenance of actin cytoskeleton polarity          | 0.045831 |
| GO:0060081 | membrane hyperpolarization                                           | 0.045831 |
| GO:0042033 | chemokine biosynthetic process                                       | 0.045831 |

|            |                                                                              |          |
|------------|------------------------------------------------------------------------------|----------|
| GO:0050755 | chemokine metabolic process                                                  | 0.045831 |
| GO:1900121 | negative regulation of receptor binding                                      | 0.045831 |
| GO:0007288 | sperm axoneme assembly                                                       | 0.045831 |
| GO:0038180 | nerve growth factor signaling pathway                                        | 0.045831 |
| GO:0060442 | branching involved in prostate gland morphogenesis                           | 0.045831 |
| GO:0043031 | negative regulation of macrophage activation                                 | 0.045831 |
| GO:0045779 | negative regulation of bone resorption                                       | 0.045831 |
| GO:0010867 | positive regulation of triglyceride biosynthetic process                     | 0.045831 |
| GO:0021903 | rostrocaudal neural tube patterning                                          | 0.045831 |
| GO:0051024 | positive regulation of immunoglobulin secretion                              | 0.045831 |
| GO:0072540 | T-helper 17 cell lineage commitment                                          | 0.045831 |
| GO:0045161 | neuronal ion channel clustering                                              | 0.045831 |
| GO:0050920 | regulation of chemotaxis                                                     | 0.045962 |
| GO:0007276 | gamete generation                                                            | 0.047458 |
| GO:0060348 | bone development                                                             | 0.047631 |
| GO:0045666 | positive regulation of neuron differentiation                                | 0.047657 |
| GO:0010557 | positive regulation of macromolecule biosynthetic process                    | 0.048101 |
| GO:0009952 | anterior/posterior pattern specification                                     | 0.04933  |
| GO:0002864 | regulation of acute inflammatory response to antigenic stimulus              | 0.049556 |
| GO:0060123 | regulation of growth hormone secretion                                       | 0.049556 |
| GO:0090197 | positive regulation of chemokine secretion                                   | 0.049556 |
| GO:0030299 | intestinal cholesterol absorption                                            | 0.049556 |
| GO:0034384 | high-density lipoprotein particle clearance                                  | 0.049556 |
| GO:0042159 | lipoprotein catabolic process                                                | 0.049556 |
| GO:0043568 | positive regulation of insulin-like growth factor receptor signaling pathway | 0.049556 |
| GO:0042659 | regulation of cell fate specification                                        | 0.049556 |
| GO:0035745 | T-helper 2 cell cytokine production                                          | 0.049556 |
| GO:2000291 | regulation of myoblast proliferation                                         | 0.049556 |
| GO:0090179 | planar cell polarity pathway involved in neural tube closure                 | 0.049556 |
| GO:0061029 | eyelid development in camera-type eye                                        | 0.049556 |
| GO:0032754 | positive regulation of interleukin-5 production                              | 0.049556 |
| GO:0051336 | regulation of hydrolase activity                                             | 0.050484 |
| GO:0014706 | striated muscle tissue development                                           | 0.050587 |
| GO:0008406 | gonad development                                                            | 0.051059 |
| GO:0032092 | positive regulation of protein binding                                       | 0.051086 |
| GO:0032870 | cellular response to hormone stimulus                                        | 0.051511 |
|            | positive regulation of nucleobase-containing compound                        |          |

|            |                                                                                      |          |
|------------|--------------------------------------------------------------------------------------|----------|
| GO:0045935 | metabolic process                                                                    | 0.051733 |
| GO:0060191 | regulation of lipase activity                                                        | 0.052068 |
| GO:0043393 | regulation of protein binding                                                        | 0.052228 |
| GO:0090087 | regulation of peptide transport                                                      | 0.053009 |
| GO:0043266 | regulation of potassium ion transport                                                | 0.053058 |
| GO:0001821 | histamine secretion                                                                  | 0.053266 |
| GO:0060732 | positive regulation of inositol phosphate biosynthetic process                       | 0.053266 |
| GO:0150078 | positive regulation of neuroinflammatory response                                    | 0.053266 |
| GO:0019372 | lipxygenase pathway                                                                  | 0.053266 |
| GO:0090196 | regulation of chemokine secretion                                                    | 0.053266 |
| GO:0098856 | intestinal lipid absorption                                                          | 0.053266 |
| GO:0010273 | detoxification of copper ion                                                         | 0.053266 |
| GO:1990169 | stress response to copper ion                                                        | 0.053266 |
| GO:0007501 | mesodermal cell fate specification                                                   | 0.053266 |
| GO:0086069 | bundle of His cell to Purkinje myocyte communication                                 | 0.053266 |
| GO:0046851 | negative regulation of bone remodeling                                               | 0.053266 |
| GO:0071850 | mitotic cell cycle arrest                                                            | 0.053266 |
| GO:0090178 | regulation of establishment of planar polarity involved in neural tube closure       | 0.053266 |
| GO:0001675 | acrosome assembly                                                                    | 0.053266 |
| GO:0007283 | spermatogenesis                                                                      | 0.053403 |
| GO:0044706 | multi-multicellular organism process                                                 | 0.05341  |
| GO:0044089 | positive regulation of cellular component biogenesis                                 | 0.05376  |
| GO:0120162 | positive regulation of cold-induced thermogenesis                                    | 0.054053 |
| GO:0010876 | lipid localization                                                                   | 0.054056 |
| GO:0006468 | protein phosphorylation                                                              | 0.054075 |
| GO:0048699 | generation of neurons                                                                | 0.054159 |
| GO:0045137 | development of primary sexual characteristics                                        | 0.054604 |
| GO:0048646 | anatomical structure formation involved in morphogenesis                             | 0.054771 |
| GO:0006650 | glycerophospholipid metabolic process                                                | 0.05539  |
| GO:0051254 | positive regulation of RNA metabolic process                                         | 0.056649 |
| GO:0060537 | muscle tissue development                                                            | 0.056741 |
| GO:0051608 | histamine transport                                                                  | 0.056962 |
| GO:0060253 | negative regulation of glial cell proliferation                                      | 0.056962 |
| GO:0044241 | lipid digestion                                                                      | 0.056962 |
| GO:1990000 | amyloid fibril formation                                                             | 0.056962 |
| GO:0030949 | positive regulation of vascular endothelial growth factor receptor signaling pathway | 0.056962 |

|            |                                                                  |          |
|------------|------------------------------------------------------------------|----------|
| GO:0061687 | detoxification of inorganic compound                             | 0.056962 |
| GO:0048368 | lateral mesoderm development                                     | 0.056962 |
| GO:0002830 | positive regulation of type 2 immune response                    | 0.056962 |
| GO:0007039 | protein catabolic process in the vacuole                         | 0.056962 |
| GO:0001711 | endodermal cell fate commitment                                  | 0.056962 |
| GO:0090177 | establishment of planar polarity involved in neural tube closure | 0.056962 |
| GO:2001028 | positive regulation of endothelial cell chemotaxis               | 0.056962 |
| GO:0050673 | epithelial cell proliferation                                    | 0.057195 |
| GO:0010035 | response to inorganic substance                                  | 0.057772 |
| GO:0007507 | heart development                                                | 0.057772 |
| GO:0030900 | forebrain development                                            | 0.058571 |
| GO:0060284 | regulation of cell development                                   | 0.058941 |
| GO:0000165 | MAPK cascade                                                     | 0.059226 |
| GO:0048232 | male gamete generation                                           | 0.060031 |
| GO:0006813 | potassium ion transport                                          | 0.060139 |
| GO:0030252 | growth hormone secretion                                         | 0.060644 |
| GO:0010919 | regulation of inositol phosphate biosynthetic process            | 0.060644 |
| GO:0090195 | chemokine secretion                                              | 0.060644 |
| GO:0001780 | neutrophil homeostasis                                           | 0.060644 |
| GO:0030952 | establishment or maintenance of cytoskeleton polarity            | 0.060644 |
| GO:0048791 | calcium ion-regulated exocytosis of neurotransmitter             | 0.060644 |
| GO:0097501 | stress response to metal ion                                     | 0.060644 |
| GO:0060252 | positive regulation of glial cell proliferation                  | 0.060644 |
| GO:0002295 | T-helper cell lineage commitment                                 | 0.060644 |
| GO:0043252 | sodium-independent organic anion transport                       | 0.060644 |
| GO:0045446 | endothelial cell differentiation                                 | 0.061207 |
| GO:0033138 | positive regulation of peptidyl-serine phosphorylation           | 0.061207 |
| GO:0014070 | response to organic cyclic compound                              | 0.061834 |
| GO:0051963 | regulation of synapse assembly                                   | 0.062255 |
| GO:0023014 | signal transduction by protein phosphorylation                   | 0.062423 |
| GO:0061337 | cardiac conduction                                               | 0.063308 |
| GO:0018108 | peptidyl-tyrosine phosphorylation                                | 0.063765 |
| GO:0010628 | positive regulation of gene expression                           | 0.063968 |
| GO:0038092 | nodal signaling pathway                                          | 0.064311 |
| GO:0060644 | mammary gland epithelial cell differentiation                    | 0.064311 |
| GO:0007567 | parturition                                                      | 0.064311 |
| GO:0010866 | regulation of triglyceride biosynthetic process                  | 0.064311 |
| GO:0070102 | interleukin-6-mediated signaling pathway                         | 0.064311 |

|                |                                                                |          |
|----------------|----------------------------------------------------------------|----------|
| GO:0060850     | regulation of transcription involved in cell fate commitment   | 0.064311 |
| GO:0051450     | myoblast proliferation                                         | 0.064311 |
| GO:0042249     | establishment of planar polarity of embryonic epithelium       | 0.064311 |
| GO:0043373     | CD4-positive, alpha-beta T cell lineage commitment             | 0.064311 |
| GO:0018212     | peptidyl-tyrosine modification                                 | 0.065223 |
| GO:0009755     | hormone-mediated signaling pathway                             | 0.065272 |
| GO:0021761     | limbic system development                                      | 0.066505 |
| GO:0007050     | cell cycle arrest                                              | 0.067248 |
| GO:0002688     | regulation of leukocyte chemotaxis                             | 0.067582 |
| GO:0030182     | neuron differentiation                                         | 0.06768  |
| GO:0090208     | positive regulation of triglyceride metabolic process          | 0.067965 |
| GO:0071404     | cellular response to low-density lipoprotein particle stimulus | 0.067965 |
| GO:2000251     | positive regulation of actin cytoskeleton reorganization       | 0.067965 |
| GO:0060749     | mammary gland alveolus development                             | 0.067965 |
| GO:0061377     | mammary gland lobule development                               | 0.067965 |
| GO:0002726     | positive regulation of T cell cytokine production              | 0.067965 |
| GO:0010832     | negative regulation of myotube differentiation                 | 0.067965 |
| GO:0001710     | mesodermal cell fate commitment                                | 0.067965 |
| GO:0007250     | activation of NF-kappaB-inducing kinase activity               | 0.067965 |
| GO:0071435     | potassium ion export                                           | 0.067965 |
| GO:0097623     | potassium ion export across plasma membrane                    | 0.067965 |
| GO:1905276     | regulation of epithelial tube formation                        | 0.067965 |
| GO:0036148     | phosphatidylglycerol acyl-chain remodeling                     | 0.067965 |
| GO:0048878     | chemical homeostasis                                           | 0.068515 |
| GO:0048870     | cell motility                                                  | 0.068534 |
| GO:0051674     | localization of cell                                           | 0.068534 |
| GO:0060349     | bone morphogenesis                                             | 0.068665 |
| GO:0007613     | memory                                                         | 0.069754 |
| GO:0055007     | cardiac muscle cell differentiation                            | 0.069754 |
| GO:0050730     | regulation of peptidyl-tyrosine phosphorylation                | 0.069924 |
| GO:0007611     | learning or memory                                             | 0.069924 |
| GO:0043547     | positive regulation of GTPase activity                         | 0.070718 |
| GO:0046854     | phosphatidylinositol phosphorylation                           | 0.070849 |
| KEGG: hsa05144 | malaria - Homo sapiens (human)                                 | 0.000942 |
| KEGG: hsa04310 | Wnt signaling pathway - Homo sapiens (human)                   | 0.002361 |
| KEGG: hsa05143 | African trypanosomiasis - Homo sapiens (human)                 | 0.008511 |
| KEGG: hsa04080 | neuroactive ligand-receptor interaction - Homo sapiens         | 0.023739 |

|                |                                                   |          |
|----------------|---------------------------------------------------|----------|
|                | (human)                                           |          |
| KEGG: hsa04630 | Jak-STAT signaling pathway - Homo sapiens (human) | 0.024644 |

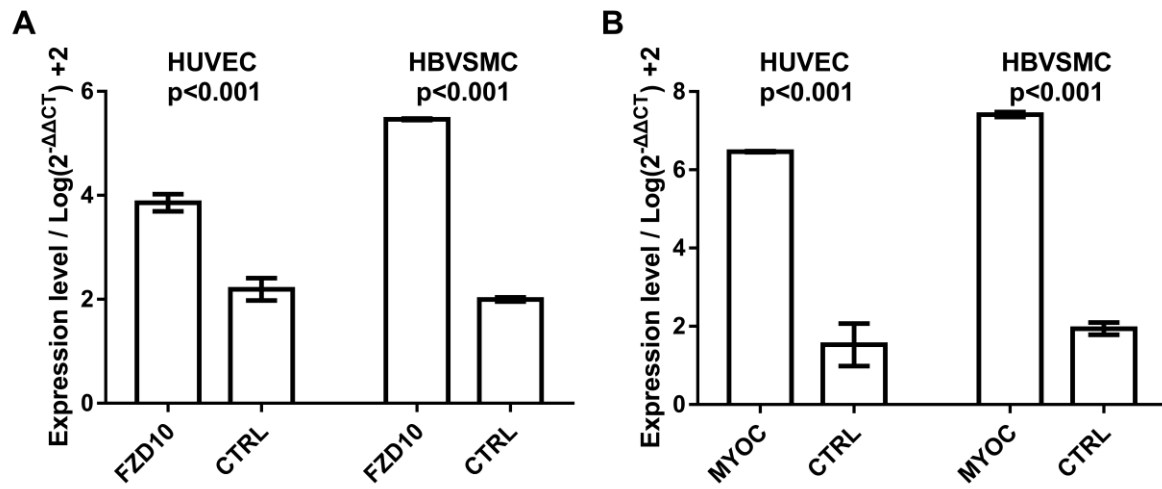

**Figure S1.** Expression level of FZD10 (A) and MYOC (B) in HUVECs and HBVSMCs after transfection.
